# Supplementary material
Source: MDPI journal article supplement (https://www.mdpi.com/2073-4344/11/11/1391)
Supplement: s1 [file s1]

## Supplementary Information

"Doing more with less": Ni(II)@ORMOSIL, a novel sol-gel pre-catalyst for the reduction of nitrobenzene

Michael Meistelman<sup>1</sup>, Dan Meyerstein\*<sup>2,3</sup>, Ariela Burg<sup>4</sup>, Dror Shamir<sup>5</sup>, and Yael Albo\*<sup>1</sup>

1 M. Meistelman, Dr. Yael Albo\*

Department of Chemical Engineering and The Centre for Radical Reactions

Ariel University

Ariel, 40700 (Israel)

E-mail: yaelyt@ariel.ac.il

2 Prof. Dan Meyerstein

Department of Chemical Sciences and The Centre for Radical Reactions

Ariel, 40700 (Israel)

E-mail: danm@ariel.ac.il

3 Chemistry Dept.,

Ben-Gurion University

Beer-Sheva, Israel

4 Prof. Ariela Burg

Department of Chemical Engineering

Sami Shamoon College of Engineering

Beer-Sheva, Israel

5 Dr. Dror Shamir

Department of Chemistry,

Nuclear Research Centre Negev

Beer-Sheva, Israel.

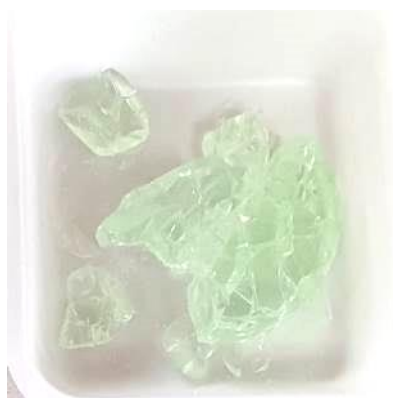

Figure S1. Raw wet 1% Ni(II)@ORMOSIL, metal ORMOSIL gel.

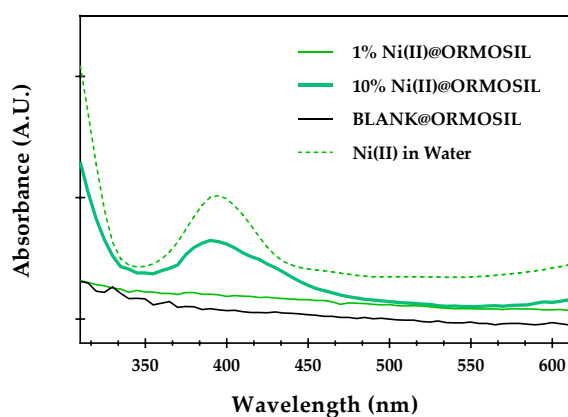

Figure S2. The overlaid spectra of 0.14M  $\text{NiCl}_2 \cdot 6\text{H}_2\text{O}$ . Dashed green: in water. Black: 0.2 gr of Blank@ORMOSIL. Light green: 0.2 gr 1.0 % Ni(II)@ORMOSIL. Dark green: 0.2 gr of 10% Ni(II)@ORMOSIL.

Table S1: XPS surface analysis elemental composition of of 1.0% Ni(II)@ORMOSIL.

| Name | Peak BE | FWHM | Area     | Atomic % |
|------|---------|------|----------|----------|
| Si2p | 103.8   | 2.84 | 60415.9  | 21.7     |
| C1s  | 284.9   | 3.17 | 84089.5  | 30.3     |
| O1s  | 533.2   | 2.77 | 318810.8 | 47.7     |
| Ni2p | 854.8   | 0.03 | 8878.9   | 0.3      |

Table S2. Metal phases found in 10% Ni(II)@ORMOSIL

| Substance | $2\theta^\circ$ | Miller Index | File No. |
|-----------|-----------------|--------------|----------|
|-----------|-----------------|--------------|----------|

|                                                                              |      |       |             |
|------------------------------------------------------------------------------|------|-------|-------------|
| $3\text{Ni}(\text{OH})_2 \cdot 2\text{H}_2\text{O}$                          | 33,7 | 1,1,0 | 00-022-0444 |
|                                                                              | 59,6 | 3,0,0 |             |
| $\text{Ni}_3\text{Si}_4\text{O}_{10}(\text{OH})_2 \cdot 5\text{H}_2\text{O}$ | 33,7 | 1,0,3 | 00-043-0664 |
|                                                                              | 60,9 | 3,0,0 |             |

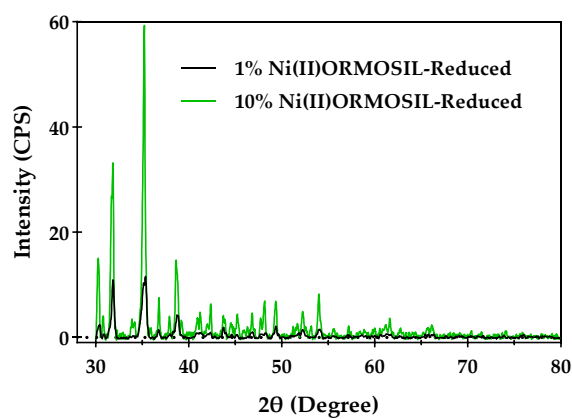

Figure S3. Diffractogram of 1% Ni(II)@ORMOSIL-Reduced, 10% Ni(II)@ORMOSIL-Reduced.

Table S3. Metal phases found in 1% Ni(II)@ORMOSIL-Reduced, 10% Ni(II)@ORMOSIL-Reduced

| Substance                                                                | $2\theta^\circ$ | Miller Index | File No.    |
|--------------------------------------------------------------------------|-----------------|--------------|-------------|
| $\text{Na}_2\text{B}_4\text{O}_5(\text{OH})_4 \cdot 8\text{H}_2\text{O}$ | 29,96           | 2,2,2        | 00-033-1215 |
|                                                                          | 30,5            | 4,0,0        |             |
|                                                                          | 31,38           | 0,0,4        |             |
|                                                                          | 31,56           | 2,3,1        |             |
|                                                                          | 34,8            | 4,1,1        |             |
|                                                                          | 34,95           | -2,3,3       |             |
|                                                                          | 34,95           | 4,2,0        |             |
|                                                                          | 36,5            | 3,3,1        |             |
|                                                                          | 38,35           | 4,0,2        |             |
|                                                                          | 38,42           | 3,1,3        |             |
|                                                                          | 38,52           | -2,4,2       |             |

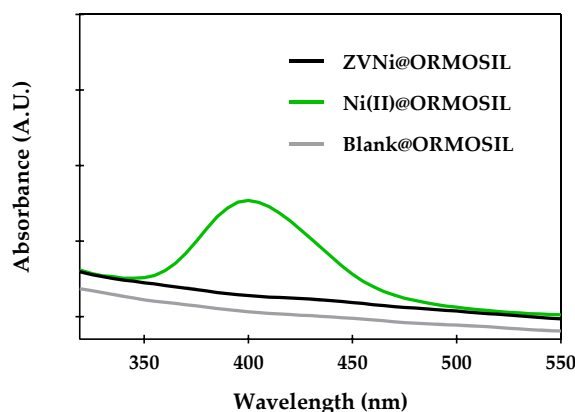

Figure S4. UV-vis spectrum; Blank@ORMOSIL-grey, 10 % Ni(II)@ORMOSIL-green, 10% ZVNi@ORMOSIL-black.

|                                                                                                                                                      |  |        |        |    |    |   |   |        |        |     |    |   |   |
|------------------------------------------------------------------------------------------------------------------------------------------------------|--|--------|--------|----|----|---|---|--------|--------|-----|----|---|---|
| Formula Na <sub>2</sub> B <sub>4</sub> O <sub>5</sub> (OH) <sub>4</sub> ·8H <sub>2</sub> O                                                           |  | d      | 2θ     | I  | h  | k | l | d      | 2θ     | I   | h  | k | l |
| Name Sodium Borate Hydroxide Hydrate                                                                                                                 |  | 7.7800 | 11.384 | 6  | 9  | 1 | 1 | 2.8440 | 33.876 | 5   | -1 | 3 | 3 |
| Name (mineral) Borax, syn                                                                                                                            |  | 7.7100 | 12.335 | 11 | -1 | 1 | 1 | 2.5760 | 34.799 | 100 | 4  | 1 | 1 |
| Name (common)                                                                                                                                        |  | 5.9700 | 14.827 | 16 | 1  | 1 | 1 | 2.3600 | 34.953 | 90  | -2 | 3 | 3 |
|                                                                                                                                                      |  | 5.8600 | 15.139 | 40 | 2  | 6 | 0 | 2.3500 | 34.953 | 90  | 4  | 2 | 0 |
|                                                                                                                                                      |  | 5.6900 | 15.561 | 50 | 0  | 0 | 2 | 2.3200 | 35.597 | 2   | 3  | 2 | 2 |
| Lattice: Monoclinic                                                                                                                                  |  | 5.3300 | 16.619 | 7  | 0  | 2 | 0 | 2.4390 | 36.511 | 11  | 3  | 3 | 1 |
| S.G.: A2/a (15)                                                                                                                                      |  | 5.2000 | 17.038 | 20 | -2 | 1 | 1 | 2.3870 | 37.653 | 4   | -3 | 3 | 3 |
|                                                                                                                                                      |  | 4.8600 | 18.239 | 80 | 1  | 2 | 0 | 2.3450 | 38.354 | 30  | 4  | 0 | 2 |
| a = 12.21900                                                                                                                                         |  | 3.9360 | 22.572 | 45 | -1 | 2 | 2 | 2.3410 | 38.422 | 25  | 3  | 1 | 3 |
| b = 10.66500                                                                                                                                         |  | 3.9360 | 22.572 | 45 | 2  | 2 | 0 | 2.3350 | 38.524 | 15  | -2 | 4 | 2 |
| c = 11.88400                                                                                                                                         |  | 3.8890 | 22.848 | 1  | 0  | 2 | 2 | 2.3130 | 38.906 | 5   | 2  | 0 | 4 |
| beta = 106.64                                                                                                                                        |  | 3.5960 | 24.738 | 7  | 2  | 6 | 2 | 2.2380 | 39.893 | 1   | -0 | 1 | 3 |
| a/b = 1.14571                                                                                                                                        |  | 3.5770 | 24.872 | 8  | 0  | 1 | 3 | 2.2160 | 40.644 | 9   | 2  | 3 | 3 |
| c/b = 1.11430                                                                                                                                        |  | 3.5770 | 24.872 | 8  | -2 | 2 | 2 | 2.2010 | 40.972 | 8   | -4 | 2 | 4 |
| Z = 4                                                                                                                                                |  | 3.4980 | 25.443 | 5  | 1  | 2 | 2 | 2.2010 | 40.972 | 8   | 3  | 4 | 0 |
| Additional Patterns: To replace 00-012-0258 and 00-024-1055. See PDF 01-075-1078                                                                     |  | 3.4980 | 25.443 | 5  | -2 | 1 | 3 | 2.1740 | 41.504 | 3   | -3 | 4 | 2 |
| General Comments: Somewhat unstable in air, losing "1/2 O" to the 5-hydrate, instability results in inconsistent results with intensity measurements |  | 3.3910 | 26.260 | 2  | 0  | 3 | 1 | 2.1620 | 41.745 | 6   | -4 | 3 | 3 |
| Sample Source or Locality: Sample from Fisher Scientific Co., Fair Lawn, New Jersey, USA; recrystallized from aqueous solution                       |  | 3.3340 | 26.717 | 3  | -1 | 3 | 1 | 2.1480 | 42.071 | 8   | 4  | 2 | 2 |
| Temperature of Data Collection: 298 K                                                                                                                |  | 3.1870 | 27.974 | 8  | 1  | 3 | 1 | 2.1220 | 42.576 | 2   | 2  | 2 | 4 |
|                                                                                                                                                      |  | 3.1870 | 27.974 | 8  | 1  | 1 | 3 | 2.0980 | 43.081 | 4   | 0  | 5 | 1 |
|                                                                                                                                                      |  | 3.0750 | 29.015 | 8  | -3 | 2 | 2 | 2.0810 | 43.451 | 10  | -1 | 5 | 1 |
|                                                                                                                                                      |  | 2.9800 | 29.961 | 40 | 2  | 2 | 2 | 2.0760 | 43.561 | 7   | -4 | 1 | 5 |
|                                                                                                                                                      |  | 2.9290 | 30.495 | 10 | 4  | 0 | 0 | 2.0440 | 44.278 | 7   | 1  | 5 | 1 |
|                                                                                                                                                      |  | 2.8480 | 31.384 | 65 | 0  | 0 | 4 | 2.0330 | 44.531 | 16  | -0 | 0 | 2 |
|                                                                                                                                                      |  | 2.8330 | 31.555 | 60 | 2  | 3 | 1 | 2.0150 | 44.950 | 8   | 4  | 1 | 3 |
|                                                                                                                                                      |  | 2.7400 | 32.655 | 1  | 2  | 1 | 3 | 1.9890 | 45.571 | 2   | 3  | 3 | 3 |
|                                                                                                                                                      |  | 2.6760 | 33.459 | 4  | -3 | 3 | 1 | 1.9830 | 45.716 | 3   | -1 | 4 | 4 |
|                                                                                                                                                      |  | 2.6550 | 33.601 | 9  | 0  | 4 | 0 | 1.9830 | 45.716 | 3   | -4 | 4 | 2 |
|                                                                                                                                                      |  | 2.6440 | 33.876 | 5  | -4 | 1 | 3 | 1.9690 | 46.060 | 5   | -2 | 3 | 5 |
| Radiation: CuKα1                                                                                                                                     |  |        |        |    |    |   |   |        |        |     |    |   |   |
| Wavelength: 1.54060                                                                                                                                  |  |        |        |    |    |   |   |        |        |     |    |   |   |
| Filter: M                                                                                                                                            |  |        |        |    |    |   |   |        |        |     |    |   |   |
| SS/FOM: 31 (0.0164,59)                                                                                                                               |  |        |        |    |    |   |   |        |        |     |    |   |   |

Figure S5: Powder diffraction file for Na<sub>2</sub>B<sub>4</sub>O<sub>5</sub>(OH)<sub>4</sub>·8H<sub>2</sub>O (#PDF-033-1215)

| d           | 2θ     | l<br>fix | h  | k | l | d           | 2θ     | l<br>fix | h  | k | l |
|-------------|--------|----------|----|---|---|-------------|--------|----------|----|---|---|
| 1.9690<br>0 | 46.060 | 5        | -1 | 3 | 5 | 1.5740<br>0 | 58.601 | 2        | 7  | 1 | 1 |
| 1.9500<br>0 | 46.535 | 9        | 3  | 4 | 2 | 1.5740<br>0 | 58.601 | 2        | 6  | 4 | 0 |
| 1.9500<br>0 | 46.535 | 9        | 6  | 0 | 0 | 1.5457<br>0 | 59.782 | 2        | -5 | 1 | 7 |
| 1.9130<br>0 | 47.490 | 12       | 2  | 1 | 5 | 1.5457<br>0 | 59.782 | 2        | 0  | 4 | 6 |
| 1.9130<br>0 | 47.490 | 12       | -3 | 3 | 5 | 1.5313<br>0 | 60.402 | 2        | 5  | 2 | 4 |
| 1.8980<br>0 | 47.889 | 11       | 0  | 0 | 6 | 1.5313<br>0 | 60.402 | 2        | -2 | 3 | 7 |
| 1.8550<br>0 | 49.071 | 9        | 5  | 3 | 1 | 1.5197<br>0 | 60.912 | 3        | 4  | 6 | 0 |
| 1.8550<br>0 | 49.071 | 9        | -2 | 2 | 6 | 1.5197<br>0 | 60.912 | 3        | -3 | 3 | 7 |
| 1.8330<br>0 | 49.699 | 12       | 6  | 2 | 0 | 1.5177<br>0 | 61.001 | 3        | -2 | 6 | 4 |
| 1.7900<br>0 | 50.978 | 4        | -4 | 4 | 4 | 1.5177<br>0 | 61.001 | 3        | -1 | 3 | 7 |
| 1.7770<br>0 | 51.378 | 5        | 4  | 3 | 3 | 1.5083<br>0 | 61.422 | 3        | 0  | 6 | 4 |
| 1.7770<br>0 | 51.378 | 5        | 0  | 6 | 0 | 1.4853<br>0 | 62.479 | 2        | -4 | 3 | 7 |
| 1.7580<br>0 | 51.974 | 10       | 1  | 6 | 0 | 1.4538<br>0 | 63.991 | 1        | -4 | 0 | 8 |
| 1.7580<br>0 | 51.974 | 10       | -6 | 3 | 1 | 1.4303<br>0 | 65.171 | 5        | -5 | 3 | 7 |
| 1.7480<br>0 | 52.294 | 3        | 2  | 4 | 4 | 1.4303<br>0 | 65.171 | 5        | 6  | 3 | 3 |
| 1.7480<br>0 | 52.294 | 3        | -4 | 5 | 1 | 1.4233<br>0 | 65.532 | 4        | 0  | 0 | 8 |
| 1.7310<br>0 | 52.847 | 2        | -6 | 3 | 3 | 1.4153<br>0 | 65.949 | 3        | 2  | 4 | 6 |
| 1.7050<br>0 | 53.717 | 8        | 2  | 5 | 3 | 1.3608<br>0 | 68.952 | 2        | -6 | 3 | 7 |
| 1.7050<br>0 | 53.717 | 8        | 2  | 3 | 5 | 1.3608<br>0 | 68.952 | 2        | -5 | 2 | 8 |
| 1.7010<br>0 | 53.853 | 11       | 2  | 6 | 0 |             |        |          |    |   |   |
| 1.7010<br>0 | 53.853 | 11       | -7 | 1 | 3 |             |        |          |    |   |   |
| 1.6613<br>0 | 55.249 | 2        | -3 | 1 | 7 |             |        |          |    |   |   |
| 1.6585<br>0 | 55.350 | 2        | -7 | 2 | 2 |             |        |          |    |   |   |
| 1.6585<br>0 | 55.350 | 2        | 1  | 6 | 2 |             |        |          |    |   |   |
| 1.6159<br>0 | 56.940 | 2        | -4 | 1 | 7 |             |        |          |    |   |   |
| 1.6159<br>0 | 56.940 | 2        | -6 | 4 | 2 |             |        |          |    |   |   |
| 1.5952<br>0 | 57.748 | 1        | 7  | 2 | 0 |             |        |          |    |   |   |
| 1.5841<br>0 | 58.191 | 1        | -2 | 5 | 5 |             |        |          |    |   |   |
| 1.5841<br>0 | 58.191 | 1        | -1 | 5 | 5 |             |        |          |    |   |   |

Figure S6: Powder diffraction file for Na<sub>2</sub>B<sub>4</sub>O<sub>5</sub>(OH)<sub>4</sub>·8H<sub>2</sub>O (continued) (#PDF-033-1215)

|                                                                                                                                                                                                                                                                                                                                                                                                                                                                                                                                                                                                                                                                                                                                                                                                                                                                                                                         |              |                                                                                                                                                                                                                                                                                                                                                                                                                                                                                                                                                                                                                                                                                                                         |          |          |          |  |  |  |          |           |          |          |          |          |          |       |     |   |   |   |         |        |    |   |   |   |         |        |    |   |   |   |         |        |    |   |   |   |         |        |    |   |   |   |         |        |    |   |   |   |         |        |    |   |   |   |
|-------------------------------------------------------------------------------------------------------------------------------------------------------------------------------------------------------------------------------------------------------------------------------------------------------------------------------------------------------------------------------------------------------------------------------------------------------------------------------------------------------------------------------------------------------------------------------------------------------------------------------------------------------------------------------------------------------------------------------------------------------------------------------------------------------------------------------------------------------------------------------------------------------------------------|--------------|-------------------------------------------------------------------------------------------------------------------------------------------------------------------------------------------------------------------------------------------------------------------------------------------------------------------------------------------------------------------------------------------------------------------------------------------------------------------------------------------------------------------------------------------------------------------------------------------------------------------------------------------------------------------------------------------------------------------------|----------|----------|----------|--|--|--|----------|-----------|----------|----------|----------|----------|----------|-------|-----|---|---|---|---------|--------|----|---|---|---|---------|--------|----|---|---|---|---------|--------|----|---|---|---|---------|--------|----|---|---|---|---------|--------|----|---|---|---|---------|--------|----|---|---|---|
| <b>Formula</b> Ni3 Si4 O10 ( O H )2 · 5 H2 O                                                                                                                                                                                                                                                                                                                                                                                                                                                                                                                                                                                                                                                                                                                                                                                                                                                                            |              | <table><tr><td><b>d</b></td><td><b>2θ</b></td><td><b>I</b></td><td><b>h</b></td><td><b>k</b></td><td><b>l</b></td></tr><tr><td>15.10000</td><td>5.848</td><td>101</td><td>0</td><td>0</td><td>1</td></tr><tr><td>4.56000</td><td>19.451</td><td>41</td><td>1</td><td>0</td><td>0</td></tr><tr><td>3.34000</td><td>26.666</td><td>21</td><td>1</td><td>0</td><td>3</td></tr><tr><td>2.66000</td><td>33.666</td><td>41</td><td>1</td><td>1</td><td>0</td></tr><tr><td>2.27000</td><td>39.673</td><td>21</td><td>2</td><td>0</td><td>0</td></tr><tr><td>1.72000</td><td>53.211</td><td>11</td><td>2</td><td>1</td><td>0</td></tr><tr><td>1.52000</td><td>60.899</td><td>81</td><td>3</td><td>0</td><td>0</td></tr></table> |          |          |          |  |  |  | <b>d</b> | <b>2θ</b> | <b>I</b> | <b>h</b> | <b>k</b> | <b>l</b> | 15.10000 | 5.848 | 101 | 0 | 0 | 1 | 4.56000 | 19.451 | 41 | 1 | 0 | 0 | 3.34000 | 26.666 | 21 | 1 | 0 | 3 | 2.66000 | 33.666 | 41 | 1 | 1 | 0 | 2.27000 | 39.673 | 21 | 2 | 0 | 0 | 1.72000 | 53.211 | 11 | 2 | 1 | 0 | 1.52000 | 60.899 | 81 | 3 | 0 | 0 |
| <b>d</b>                                                                                                                                                                                                                                                                                                                                                                                                                                                                                                                                                                                                                                                                                                                                                                                                                                                                                                                | <b>2θ</b>    | <b>I</b>                                                                                                                                                                                                                                                                                                                                                                                                                                                                                                                                                                                                                                                                                                                | <b>h</b> | <b>k</b> | <b>l</b> |  |  |  |          |           |          |          |          |          |          |       |     |   |   |   |         |        |    |   |   |   |         |        |    |   |   |   |         |        |    |   |   |   |         |        |    |   |   |   |         |        |    |   |   |   |         |        |    |   |   |   |
| 15.10000                                                                                                                                                                                                                                                                                                                                                                                                                                                                                                                                                                                                                                                                                                                                                                                                                                                                                                                | 5.848        | 101                                                                                                                                                                                                                                                                                                                                                                                                                                                                                                                                                                                                                                                                                                                     | 0        | 0        | 1        |  |  |  |          |           |          |          |          |          |          |       |     |   |   |   |         |        |    |   |   |   |         |        |    |   |   |   |         |        |    |   |   |   |         |        |    |   |   |   |         |        |    |   |   |   |         |        |    |   |   |   |
| 4.56000                                                                                                                                                                                                                                                                                                                                                                                                                                                                                                                                                                                                                                                                                                                                                                                                                                                                                                                 | 19.451       | 41                                                                                                                                                                                                                                                                                                                                                                                                                                                                                                                                                                                                                                                                                                                      | 1        | 0        | 0        |  |  |  |          |           |          |          |          |          |          |       |     |   |   |   |         |        |    |   |   |   |         |        |    |   |   |   |         |        |    |   |   |   |         |        |    |   |   |   |         |        |    |   |   |   |         |        |    |   |   |   |
| 3.34000                                                                                                                                                                                                                                                                                                                                                                                                                                                                                                                                                                                                                                                                                                                                                                                                                                                                                                                 | 26.666       | 21                                                                                                                                                                                                                                                                                                                                                                                                                                                                                                                                                                                                                                                                                                                      | 1        | 0        | 3        |  |  |  |          |           |          |          |          |          |          |       |     |   |   |   |         |        |    |   |   |   |         |        |    |   |   |   |         |        |    |   |   |   |         |        |    |   |   |   |         |        |    |   |   |   |         |        |    |   |   |   |
| 2.66000                                                                                                                                                                                                                                                                                                                                                                                                                                                                                                                                                                                                                                                                                                                                                                                                                                                                                                                 | 33.666       | 41                                                                                                                                                                                                                                                                                                                                                                                                                                                                                                                                                                                                                                                                                                                      | 1        | 1        | 0        |  |  |  |          |           |          |          |          |          |          |       |     |   |   |   |         |        |    |   |   |   |         |        |    |   |   |   |         |        |    |   |   |   |         |        |    |   |   |   |         |        |    |   |   |   |         |        |    |   |   |   |
| 2.27000                                                                                                                                                                                                                                                                                                                                                                                                                                                                                                                                                                                                                                                                                                                                                                                                                                                                                                                 | 39.673       | 21                                                                                                                                                                                                                                                                                                                                                                                                                                                                                                                                                                                                                                                                                                                      | 2        | 0        | 0        |  |  |  |          |           |          |          |          |          |          |       |     |   |   |   |         |        |    |   |   |   |         |        |    |   |   |   |         |        |    |   |   |   |         |        |    |   |   |   |         |        |    |   |   |   |         |        |    |   |   |   |
| 1.72000                                                                                                                                                                                                                                                                                                                                                                                                                                                                                                                                                                                                                                                                                                                                                                                                                                                                                                                 | 53.211       | 11                                                                                                                                                                                                                                                                                                                                                                                                                                                                                                                                                                                                                                                                                                                      | 2        | 1        | 0        |  |  |  |          |           |          |          |          |          |          |       |     |   |   |   |         |        |    |   |   |   |         |        |    |   |   |   |         |        |    |   |   |   |         |        |    |   |   |   |         |        |    |   |   |   |         |        |    |   |   |   |
| 1.52000                                                                                                                                                                                                                                                                                                                                                                                                                                                                                                                                                                                                                                                                                                                                                                                                                                                                                                                 | 60.899       | 81                                                                                                                                                                                                                                                                                                                                                                                                                                                                                                                                                                                                                                                                                                                      | 3        | 0        | 0        |  |  |  |          |           |          |          |          |          |          |       |     |   |   |   |         |        |    |   |   |   |         |        |    |   |   |   |         |        |    |   |   |   |         |        |    |   |   |   |         |        |    |   |   |   |         |        |    |   |   |   |
| <b>Lattice:</b> Hexagonal                                                                                                                                                                                                                                                                                                                                                                                                                                                                                                                                                                                                                                                                                                                                                                                                                                                                                               |              | <b>Mol. weight</b> = 572.53                                                                                                                                                                                                                                                                                                                                                                                                                                                                                                                                                                                                                                                                                             |          |          |          |  |  |  |          |           |          |          |          |          |          |       |     |   |   |   |         |        |    |   |   |   |         |        |    |   |   |   |         |        |    |   |   |   |         |        |    |   |   |   |         |        |    |   |   |   |         |        |    |   |   |   |
| <b>S.G.:</b> P (0)                                                                                                                                                                                                                                                                                                                                                                                                                                                                                                                                                                                                                                                                                                                                                                                                                                                                                                      |              | <b>Volume [CD]</b> = 354.42                                                                                                                                                                                                                                                                                                                                                                                                                                                                                                                                                                                                                                                                                             |          |          |          |  |  |  |          |           |          |          |          |          |          |       |     |   |   |   |         |        |    |   |   |   |         |        |    |   |   |   |         |        |    |   |   |   |         |        |    |   |   |   |         |        |    |   |   |   |         |        |    |   |   |   |
|                                                                                                                                                                                                                                                                                                                                                                                                                                                                                                                                                                                                                                                                                                                                                                                                                                                                                                                         |              | <b>Dx</b> =                                                                                                                                                                                                                                                                                                                                                                                                                                                                                                                                                                                                                                                                                                             |          |          |          |  |  |  |          |           |          |          |          |          |          |       |     |   |   |   |         |        |    |   |   |   |         |        |    |   |   |   |         |        |    |   |   |   |         |        |    |   |   |   |         |        |    |   |   |   |         |        |    |   |   |   |
|                                                                                                                                                                                                                                                                                                                                                                                                                                                                                                                                                                                                                                                                                                                                                                                                                                                                                                                         |              | <b>Dm</b> =                                                                                                                                                                                                                                                                                                                                                                                                                                                                                                                                                                                                                                                                                                             |          |          |          |  |  |  |          |           |          |          |          |          |          |       |     |   |   |   |         |        |    |   |   |   |         |        |    |   |   |   |         |        |    |   |   |   |         |        |    |   |   |   |         |        |    |   |   |   |         |        |    |   |   |   |
|                                                                                                                                                                                                                                                                                                                                                                                                                                                                                                                                                                                                                                                                                                                                                                                                                                                                                                                         |              | <b>Vcor</b> = -1.000                                                                                                                                                                                                                                                                                                                                                                                                                                                                                                                                                                                                                                                                                                    |          |          |          |  |  |  |          |           |          |          |          |          |          |       |     |   |   |   |         |        |    |   |   |   |         |        |    |   |   |   |         |        |    |   |   |   |         |        |    |   |   |   |         |        |    |   |   |   |         |        |    |   |   |   |
| <b>a</b> = 5.25500                                                                                                                                                                                                                                                                                                                                                                                                                                                                                                                                                                                                                                                                                                                                                                                                                                                                                                      | <b>Z</b> = 1 |                                                                                                                                                                                                                                                                                                                                                                                                                                                                                                                                                                                                                                                                                                                         |          |          |          |  |  |  |          |           |          |          |          |          |          |       |     |   |   |   |         |        |    |   |   |   |         |        |    |   |   |   |         |        |    |   |   |   |         |        |    |   |   |   |         |        |    |   |   |   |         |        |    |   |   |   |
| <b>c</b> = 14.82000                                                                                                                                                                                                                                                                                                                                                                                                                                                                                                                                                                                                                                                                                                                                                                                                                                                                                                     |              |                                                                                                                                                                                                                                                                                                                                                                                                                                                                                                                                                                                                                                                                                                                         |          |          |          |  |  |  |          |           |          |          |          |          |          |       |     |   |   |   |         |        |    |   |   |   |         |        |    |   |   |   |         |        |    |   |   |   |         |        |    |   |   |   |         |        |    |   |   |   |         |        |    |   |   |   |
| <b>ab</b> = 1.00000                                                                                                                                                                                                                                                                                                                                                                                                                                                                                                                                                                                                                                                                                                                                                                                                                                                                                                     |              |                                                                                                                                                                                                                                                                                                                                                                                                                                                                                                                                                                                                                                                                                                                         |          |          |          |  |  |  |          |           |          |          |          |          |          |       |     |   |   |   |         |        |    |   |   |   |         |        |    |   |   |   |         |        |    |   |   |   |         |        |    |   |   |   |         |        |    |   |   |   |         |        |    |   |   |   |
| <b>cb</b> = 2.82017                                                                                                                                                                                                                                                                                                                                                                                                                                                                                                                                                                                                                                                                                                                                                                                                                                                                                                     |              |                                                                                                                                                                                                                                                                                                                                                                                                                                                                                                                                                                                                                                                                                                                         |          |          |          |  |  |  |          |           |          |          |          |          |          |       |     |   |   |   |         |        |    |   |   |   |         |        |    |   |   |   |         |        |    |   |   |   |         |        |    |   |   |   |         |        |    |   |   |   |         |        |    |   |   |   |
| <p>Analysis: Microprobe analysis (wt %): Si O<sup>2</sup> 41.50, FeO 0.02, NiO 30.76, MgO 8.09, CaO 0.10, H<sub>2</sub>O 19.45 (by difference) 19</p> <p>51: Ni<sub>2</sub> 26 Mg<sub>1</sub> 11 Si<sub>3</sub> 81 O<sub>10</sub> ( O H )<sub>2</sub> · 5 H<sub>2</sub> O</p> <p>General Comments: Reflections on specimen from Dry Nickel mine, Bindura, Zimbabwe. Vacancy exists in formula. Ethylene glycol complex. The reflections are the average of several films</p> <p>Color values (air, C Illuminant): x= 313, y=46, z=584</p> <p>1: x=584, P=0.9</p> <p>Sample Preparation: Soaked in ethylene glycol for 24 hours</p> <p>Reflectance: R(λ): 46 (546nm); 46 (470nm); 46 (589nm); 49 (650nm)</p> <p>Sample Source or Locality: Specimen from Silesia, Poland (Durham University Collection 9032)</p> <p>Vickers Hardness Number: VHR100=379-427</p> <p>Warning: Lines with abs(delta 2theta)&gt;0.06 DEG</p> |              |                                                                                                                                                                                                                                                                                                                                                                                                                                                                                                                                                                                                                                                                                                                         |          |          |          |  |  |  |          |           |          |          |          |          |          |       |     |   |   |   |         |        |    |   |   |   |         |        |    |   |   |   |         |        |    |   |   |   |         |        |    |   |   |   |         |        |    |   |   |   |         |        |    |   |   |   |
|                                                                                                                                                                                                                                                                                                                                                                                                                                                                                                                                                                                                                                                                                                                                                                                                                                                                                                                         |              |                                                                                                                                                                                                                                                                                                                                                                                                                                                                                                                                                                                                                                                                                                                         |          |          |          |  |  |  |          |           |          |          |          |          |          |       |     |   |   |   |         |        |    |   |   |   |         |        |    |   |   |   |         |        |    |   |   |   |         |        |    |   |   |   |         |        |    |   |   |   |         |        |    |   |   |   |
| <b>Radiation:</b> CuKα                                                                                                                                                                                                                                                                                                                                                                                                                                                                                                                                                                                                                                                                                                                                                                                                                                                                                                  |              | <b>Filter:</b> F                                                                                                                                                                                                                                                                                                                                                                                                                                                                                                                                                                                                                                                                                                        |          |          |          |  |  |  |          |           |          |          |          |          |          |       |     |   |   |   |         |        |    |   |   |   |         |        |    |   |   |   |         |        |    |   |   |   |         |        |    |   |   |   |         |        |    |   |   |   |         |        |    |   |   |   |
| <b>Wavelength:</b> 1.54060                                                                                                                                                                                                                                                                                                                                                                                                                                                                                                                                                                                                                                                                                                                                                                                                                                                                                              |              | <b>d-spacing:</b>                                                                                                                                                                                                                                                                                                                                                                                                                                                                                                                                                                                                                                                                                                       |          |          |          |  |  |  |          |           |          |          |          |          |          |       |     |   |   |   |         |        |    |   |   |   |         |        |    |   |   |   |         |        |    |   |   |   |         |        |    |   |   |   |         |        |    |   |   |   |         |        |    |   |   |   |
| <b>h:</b>                                                                                                                                                                                                                                                                                                                                                                                                                                                                                                                                                                                                                                                                                                                                                                                                                                                                                                               |              |                                                                                                                                                                                                                                                                                                                                                                                                                                                                                                                                                                                                                                                                                                                         |          |          |          |  |  |  |          |           |          |          |          |          |          |       |     |   |   |   |         |        |    |   |   |   |         |        |    |   |   |   |         |        |    |   |   |   |         |        |    |   |   |   |         |        |    |   |   |   |         |        |    |   |   |   |
| <b>SS/FOM:</b> 1.3 (0.1248,42)                                                                                                                                                                                                                                                                                                                                                                                                                                                                                                                                                                                                                                                                                                                                                                                                                                                                                          |              |                                                                                                                                                                                                                                                                                                                                                                                                                                                                                                                                                                                                                                                                                                                         |          |          |          |  |  |  |          |           |          |          |          |          |          |       |     |   |   |   |         |        |    |   |   |   |         |        |    |   |   |   |         |        |    |   |   |   |         |        |    |   |   |   |         |        |    |   |   |   |         |        |    |   |   |   |

Figure S7: Powder diffraction file for Ni<sub>3</sub>Si<sub>4</sub>O<sub>10</sub>(OH)<sub>2</sub>·5H<sub>2</sub>O (#PDF-00-043-0664)

|                                            |              |                             |  |  |  |  |  |  |
|--------------------------------------------|--------------|-----------------------------|--|--|--|--|--|--|
| <b>Formula</b> 3 Ni (OH)2 · 2 H2 O         |              | <b>d</b>                    |  |  |  |  |  |  |
| <b>Name</b> Nickel Hydroxide Hydrate       |              | 7.60000 11.634 101 0 0 1    |  |  |  |  |  |  |
| <b>Name (mineral)</b>                      |              | 3.74000 23.772 51 0 0 2     |  |  |  |  |  |  |
| <b>Name (common)</b> ±-3 Ni (OH)2 · 2 H2 O |              | 2.66000 33.666 81 1 1 0     |  |  |  |  |  |  |
|                                            |              | 2.64800 35.193 81 1 1 1     |  |  |  |  |  |  |
|                                            |              | 2.31000 38.958 51 2 0 0     |  |  |  |  |  |  |
|                                            |              | 2.19000 41.187 81 1 0 3     |  |  |  |  |  |  |
|                                            |              | 1.88000 48.376 11 0 0 4     |  |  |  |  |  |  |
|                                            |              | 1.55000 59.599 70 3 0 0     |  |  |  |  |  |  |
|                                            |              | 1.52000 60.899 6 3 0 1      |  |  |  |  |  |  |
|                                            |              | 1.45000 64.179 6 2 0 4      |  |  |  |  |  |  |
|                                            |              | 1.36000 68.999 41           |  |  |  |  |  |  |
|                                            |              | 1.33000 70.786 11 2 2 0     |  |  |  |  |  |  |
|                                            |              | 1.01000 89.401 21 4 1 0     |  |  |  |  |  |  |
|                                            |              | 0.89400 119.001 21 3 1 6    |  |  |  |  |  |  |
| <b>Lattice:</b> Hexagonal                  |              |                             |  |  |  |  |  |  |
| <b>S.G.:</b> P-31m (162)                   |              |                             |  |  |  |  |  |  |
|                                            |              | <b>Mol. weight</b> = 314.17 |  |  |  |  |  |  |
|                                            |              | <b>Volume [CD]</b> = 185.21 |  |  |  |  |  |  |
|                                            |              | <b>Dx</b> =                 |  |  |  |  |  |  |
|                                            |              | <b>Dm</b> =                 |  |  |  |  |  |  |
|                                            |              | <b>Vcor</b> = -1.000        |  |  |  |  |  |  |
| <b>a</b> = 5.34000                         | <b>Z</b> = 1 |                             |  |  |  |  |  |  |
| <b>c</b> = 7.50000                         |              |                             |  |  |  |  |  |  |
| <b>ab</b> = 1.00000                        |              |                             |  |  |  |  |  |  |
| <b>cb</b> = 1.40449                        |              |                             |  |  |  |  |  |  |
|                                            |              |                             |  |  |  |  |  |  |
|                                            |              |                             |  |  |  |  |  |  |
|                                            |              |                             |  |  |  |  |  |  |
|                                            |              |                             |  |  |  |  |  |  |
|                                            |              |                             |  |  |  |  |  |  |
|                                            |              |                             |  |  |  |  |  |  |
|                                            |              |                             |  |  |  |  |  |  |
|                                            |              |                             |  |  |  |  |  |  |
|                                            |              |                             |  |  |  |  |  |  |
|                                            |              |                             |  |  |  |  |  |  |
|                                            |              |                             |  |  |  |  |  |  |
|                                            |              |                             |  |  |  |  |  |  |
|                                            |              |                             |  |  |  |  |  |  |
|                                            |              |                             |  |  |  |  |  |  |
|                                            |              |                             |  |  |  |  |  |  |
|                                            |              |                             |  |  |  |  |  |  |
|                                            |              |                             |  |  |  |  |  |  |
|                                            |              |                             |  |  |  |  |  |  |
|                                            |              |                             |  |  |  |  |  |  |
|                                            |              |                             |  |  |  |  |  |  |
|                                            |              |                             |  |  |  |  |  |  |
|                                            |              |                             |  |  |  |  |  |  |
|                                            |              |                             |  |  |  |  |  |  |
|                                            |              |                             |  |  |  |  |  |  |
|                                            |              |                             |  |  |  |  |  |  |
|                                            |              |                             |  |  |  |  |  |  |
|                                            |              |                             |  |  |  |  |  |  |
|                                            |              |                             |  |  |  |  |  |  |
|                                            |              |                             |  |  |  |  |  |  |
|                                            |              |                             |  |  |  |  |  |  |
|                                            |              |                             |  |  |  |  |  |  |
|                                            |              |                             |  |  |  |  |  |  |
|                                            |              |                             |  |  |  |  |  |  |
|                                            |              |                             |  |  |  |  |  |  |
|                                            |              |                             |  |  |  |  |  |  |
|                                            |              |                             |  |  |  |  |  |  |
|                                            |              |                             |  |  |  |  |  |  |
|                                            |              |                             |  |  |  |  |  |  |
|                                            |              |                             |  |  |  |  |  |  |
|                                            |              |                             |  |  |  |  |  |  |
|                                            |              |                             |  |  |  |  |  |  |
|                                            |              |                             |  |  |  |  |  |  |
|                                            |              |                             |  |  |  |  |  |  |
|                                            |              |                             |  |  |  |  |  |  |
|                                            |              |                             |  |  |  |  |  |  |
|                                            |              |                             |  |  |  |  |  |  |
|                                            |              |                             |  |  |  |  |  |  |
|                                            |              |                             |  |  |  |  |  |  |
|                                            |              |                             |  |  |  |  |  |  |
|                                            |              |                             |  |  |  |  |  |  |
|                                            |              |                             |  |  |  |  |  |  |
|                                            |              |                             |  |  |  |  |  |  |
|                                            |              |                             |  |  |  |  |  |  |
|                                            |              |                             |  |  |  |  |  |  |
|                                            |              |                             |  |  |  |  |  |  |
|                                            |              |                             |  |  |  |  |  |  |
|                                            |              |                             |  |  |  |  |  |  |
|                                            |              |                             |  |  |  |  |  |  |
|                                            |              |                             |  |  |  |  |  |  |
|                                            |              |                             |  |  |  |  |  |  |
|                                            |              |                             |  |  |  |  |  |  |
|                                            |              |                             |  |  |  |  |  |  |
|                                            |              |                             |  |  |  |  |  |  |
|                                            |              |                             |  |  |  |  |  |  |
|                                            |              |                             |  |  |  |  |  |  |
|                                            |              |                             |  |  |  |  |  |  |
|                                            |              |                             |  |  |  |  |  |  |
|                                            |              |                             |  |  |  |  |  |  |
|                                            |              |                             |  |  |  |  |  |  |
|                                            |              |                             |  |  |  |  |  |  |
|                                            |              |                             |  |  |  |  |  |  |
|                                            |              |                             |  |  |  |  |  |  |
|                                            |              |                             |  |  |  |  |  |  |
|                                            |              |                             |  |  |  |  |  |  |
|                                            |              |                             |  |  |  |  |  |  |
|                                            |              |                             |  |  |  |  |  |  |
|                                            |              |                             |  |  |  |  |  |  |
|                                            |              |                             |  |  |  |  |  |  |
|                                            |              |                             |  |  |  |  |  |  |
|                                            |              |                             |  |  |  |  |  |  |
|                                            |              |                             |  |  |  |  |  |  |
|                                            |              |                             |  |  |  |  |  |  |
|                                            |              |                             |  |  |  |  |  |  |
|                                            |              |                             |  |  |  |  |  |  |
|                                            |              |                             |  |  |  |  |  |  |
|                                            |              |                             |  |  |  |  |  |  |
|                                            |              |                             |  |  |  |  |  |  |
|                                            |              |                             |  |  |  |  |  |  |
|                                            |              |                             |  |  |  |  |  |  |
|                                            |              |                             |  |  |  |  |  |  |
|                                            |              |                             |  |  |  |  |  |  |
|                                            |              |                             |  |  |  |  |  |  |
|                                            |              |                             |  |  |  |  |  |  |
|                                            |              |                             |  |  |  |  |  |  |
|                                            |              |                             |  |  |  |  |  |  |
|                                            |              |                             |  |  |  |  |  |  |
|                                            |              |                             |  |  |  |  |  |  |
|                                            |              |                             |  |  |  |  |  |  |
|                                            |              |                             |  |  |  |  |  |  |
|                                            |              |                             |  |  |  |  |  |  |
|                                            |              |                             |  |  |  |  |  |  |
|                                            |              |                             |  |  |  |  |  |  |
|                                            |              |                             |  |  |  |  |  |  |
|                                            |              |                             |  |  |  |  |  |  |
|                                            |              |                             |  |  |  |  |  |  |
|                                            |              |                             |  |  |  |  |  |  |
|                                            |              |                             |  |  |  |  |  |  |
|                                            |              |                             |  |  |  |  |  |  |
|                                            |              |                             |  |  |  |  |  |  |
|                                            |              |                             |  |  |  |  |  |  |
|                                            |              |                             |  |  |  |  |  |  |
|                                            |              |                             |  |  |  |  |  |  |
|                                            |              |                             |  |  |  |  |  |  |
|                                            |              |                             |  |  |  |  |  |  |
|                                            |              |                             |  |  |  |  |  |  |
|                                            |              |                             |  |  |  |  |  |  |
|                                            |              |                             |  |  |  |  |  |  |
|                                            |              |                             |  |  |  |  |  |  |
|                                            |              |                             |  |  |  |  |  |  |
|                                            |              |                             |  |  |  |  |  |  |
|                                            |              |                             |  |  |  |  |  |  |
|                                            |              |                             |  |  |  |  |  |  |
|                                            |              |                             |  |  |  |  |  |  |
|                                            |              |                             |  |  |  |  |  |  |
|                                            |              |                             |  |  |  |  |  |  |
|                                            |              |                             |  |  |  |  |  |  |
|                                            |              |                             |  |  |  |  |  |  |
|                                            |              |                             |  |  |  |  |  |  |
|                                            |              |                             |  |  |  |  |  |  |
|                                            |              |                             |  |  |  |  |  |  |
|                                            |              |                             |  |  |  |  |  |  |
|                                            |              |                             |  |  |  |  |  |  |
|                                            |              |                             |  |  |  |  |  |  |
|                                            |              |                             |  |  |  |  |  |  |
|                                            |              |                             |  |  |  |  |  |  |
|                                            |              |                             |  |  |  |  |  |  |
|                                            |              |                             |  |  |  |  |  |  |
|                                            |              |                             |  |  |  |  |  |  |
|                                            |              |                             |  |  |  |  |  |  |
|                                            |              |                             |  |  |  |  |  |  |
|                                            |              |                             |  |  |  |  |  |  |
|                                            |              |                             |  |  |  |  |  |  |
|                                            |              |                             |  |  |  |  |  |  |
|                                            |              |                             |  |  |  |  |  |  |
|                                            |              |                             |  |  |  |  |  |  |
|                                            |              |                             |  |  |  |  |  |  |
|                                            |              |                             |  |  |  |  |  |  |
|                                            |              |                             |  |  |  |  |  |  |
|                                            |              |                             |  |  |  |  |  |  |
|                                            |              |                             |  |  |  |  |  |  |
|                                            |              |                             |  |  |  |  |  |  |
|                                            |              |                             |  |  |  |  |  |  |
|                                            |              |                             |  |  |  |  |  |  |
|                                            |              |                             |  |  |  |  |  |  |
|                                            |              |                             |  |  |  |  |  |  |
|                                            |              |                             |  |  |  |  |  |  |
|                                            |              |                             |  |  |  |  |  |  |
|                                            |              |                             |  |  |  |  |  |  |
|                                            |              |                             |  |  |  |  |  |  |
|                                            |              |                             |  |  |  |  |  |  |
|                                            |              |                             |  |  |  |  |  |  |
|                                            |              |                             |  |  |  |  |  |  |
|                                            |              |                             |  |  |  |  |  |  |
|                                            |              |                             |  |  |  |  |  |  |
|                                            |              |                             |  |  |  |  |  |  |
|                                            |              |                             |  |  |  |  |  |  |
|                                            |              |                             |  |  |  |  |  |  |
|                                            |              |                             |  |  |  |  |  |  |
|                                            |              |                             |  |  |  |  |  |  |
|                                            |              |                             |  |  |  |  |  |  |
|                                            |              |                             |  |  |  |  |  |  |
|                                            |              |                             |  |  |  |  |  |  |
|                                            |              |                             |  |  |  |  |  |  |
|                                            |              |                             |  |  |  |  |  |  |
|                                            |              |                             |  |  |  |  |  |  |
|                                            |              |                             |  |  |  |  |  |  |
|                                            |              |                             |  |  |  |  |  |  |
|                                            |              |                             |  |  |  |  |  |  |
|                                            |              |                             |  |  |  |  |  |  |
|                                            |              |                             |  |  |  |  |  |  |
|                                            |              |                             |  |  |  |  |  |  |
|                                            |              |                             |  |  |  |  |  |  |
|                                            |              |                             |  |  |  |  |  |  |
|                                            |              |                             |  |  |  |  |  |  |
|                                            |              |                             |  |  |  |  |  |  |
|                                            |              |                             |  |  |  |  |  |  |
|                                            |              |                             |  |  |  |  |  |  |
|                                            |              |                             |  |  |  |  |  |  |
|                                            |              |                             |  |  |  |  |  |  |
|                                            |              |                             |  |  |  |  |  |  |
|                                            |              |                             |  |  |  |  |  |  |
|                                            |              |                             |  |  |  |  |  |  |
|                                            |              |                             |  |  |  |  |  |  |
|                                            |              |                             |  |  |  |  |  |  |
|                                            |              |                             |  |  |  |  |  |  |
|                                            |              |                             |  |  |  |  |  |  |
|                                            |              |                             |  |  |  |  |  |  |
|                                            |              |                             |  |  |  |  |  |  |
|                                            |              |                             |  |  |  |  |  |  |
|                                            |              |                             |  |  |  |  |  |  |
|                                            |              |                             |  |  |  |  |  |  |
|                                            |              |                             |  |  |  |  |  |  |
|                                            |              |                             |  |  |  |  |  |  |
|                                            |              |                             |  |  |  |  |  |  |
|                                            |              |                             |  |  |  |  |  |  |
|                                            |              |                             |  |  |  |  |  |  |
|                                            |              |                             |  |  |  |  |  |  |
|                                            |              |                             |  |  |  |  |  |  |
|                                            |              |                             |  |  |  |  |  |  |
|                                            |              |                             |  |  |  |  |  |  |
|                                            |              |                             |  |  |  |  |  |  |
|                                            |              |                             |  |  |  |  |  |  |
|                                            |              |                             |  |  |  |  |  |  |
|                                            |              |                             |  |  |  |  |  |  |
|                                            |              |                             |  |  |  |  |  |  |
|                                            |              |                             |  |  |  |  |  |  |
|                                            |              |                             |  |  |  |  |  |  |
|                                            |              |                             |  |  |  |  |  |  |
|                                            |              |                             |  |  |  |  |  |  |
|                                            |              |                             |  |  |  |  |  |  |
|                                            |              |                             |  |  |  |  |  |  |
|                                            |              |                             |  |  |  |  |  |  |
|                                            |              |                             |  |  |  |  |  |  |
|                                            |              |                             |  |  |  |  |  |  |
|                                            |              |                             |  |  |  |  |  |  |
|                                            |              |                             |  |  |  |  |  |  |
|                                            |              |                             |  |  |  |  |  |  |
|                                            |              |                             |  |  |  |  |  |  |
|                                            |              |                             |  |  |  |  |  |  |
|                                            |              |                             |  |  |  |  |  |  |
|                                            |              |                             |  |  |  |  |  |  |
|                                            |              |                             |  |  |  |  |  |  |
|                                            |              |                             |  |  |  |  |  |  |
|                                            |              |                             |  |  |  |  |  |  |
|                                            |              |                             |  |  |  |  |  |  |
|                                            |              |                             |  |  |  |  |  |  |
|                                            |              |                             |  |  |  |  |  |  |
|                                            |              |                             |  |  |  |  |  |  |
|                                            |              |                             |  |  |  |  |  |  |
|                                            |              |                             |  |  |  |  |  |  |
|                                            |              |                             |  |  |  |  |  |  |
|                                            |              |                             |  |  |  |  |  |  |
|                                            |              |                             |  |  |  |  |  |  |
|                                            |              |                             |  |  |  |  |  |  |
|                                            |              |                             |  |  |  |  |  |  |
|                                            |              |                             |  |  |  |  |  |  |
|                                            |              |                             |  |  |  |  |  |  |
|                                            |              |                             |  |  |  |  |  |  |
|                                            |              |                             |  |  |  |  |  |  |
|                                            |              |                             |  |  |  |  |  |  |
|                                            |              |                             |  |  |  |  |  |  |
|                                            |              |                             |  |  |  |  |  |  |
|                                            |              |                             |  |  |  |  |  |  |
|                                            |              |                             |  |  |  |  |  |  |
|                                            |              |                             |  |  |  |  |  |  |
|                                            |              |                             |  |  |  |  |  |  |
|                                            |              |                             |  |  |  |  |  |  |
|                                            |              | </                          |  |  |  |  |  |  |

Figure S8: Powder diffraction file for 3Ni(OH)<sub>2</sub>·2H<sub>2</sub>O (#PDF-00-022-0444)

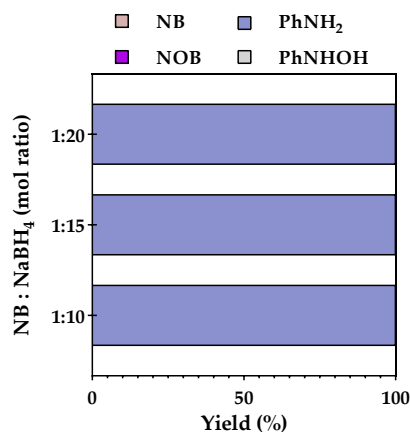

Figure S9: Product distribution of NB reduction, the catalyst load effect. The reaction suspensions contained 0.20 g 0.2% Ni(II)@ORMOSIL catalyst at ambient conditions. Reaction time 60 min. 10 mM [NB], 100,150,200 mM [NaBH<sub>4</sub>], reaction medium: 10% Acetonitrile.

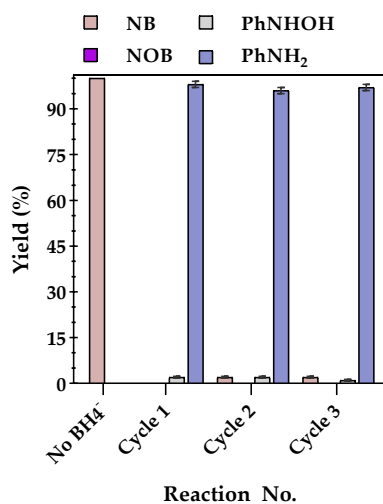

Figure S10: Repeated use in Nitrobenzene (NB) reductions performed in by different catalysts [NB] = 10 mM, [NaBH<sub>4</sub>] = 60 mM, reaction medium (9:1) (H<sub>2</sub>O: ACN) for 60 min with 0.20 g catalyst (a)Ni(II)@ORMOSIL.

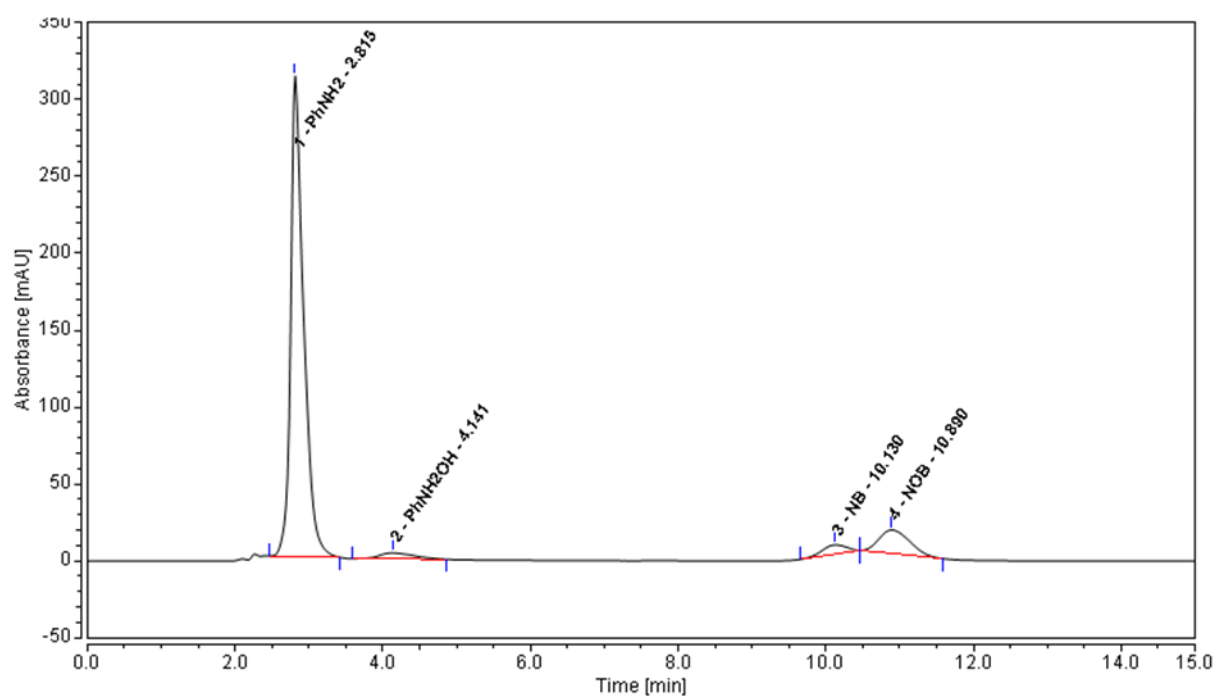

Figure S11: Typical chromatogram for NB reduction that is illustrated in figure 11b



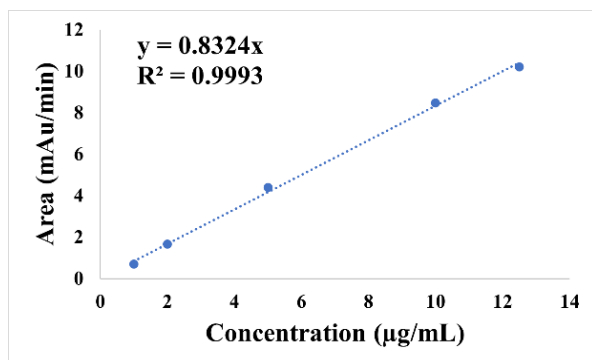

(a)

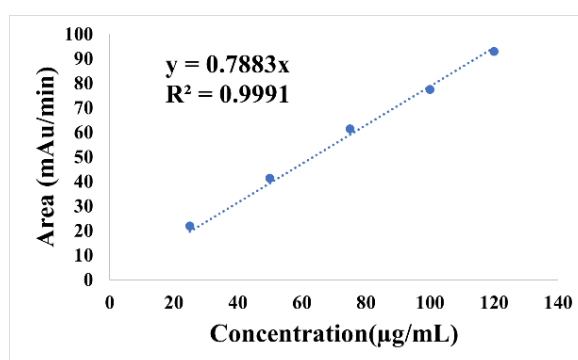

(b)

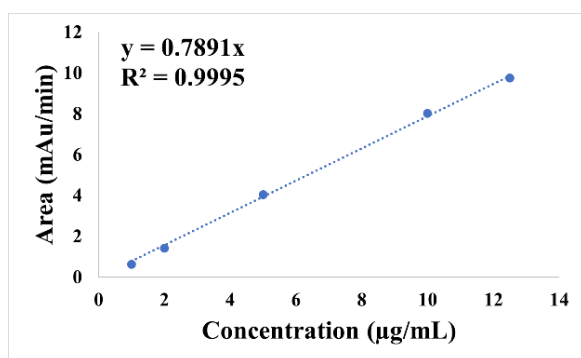

(c)

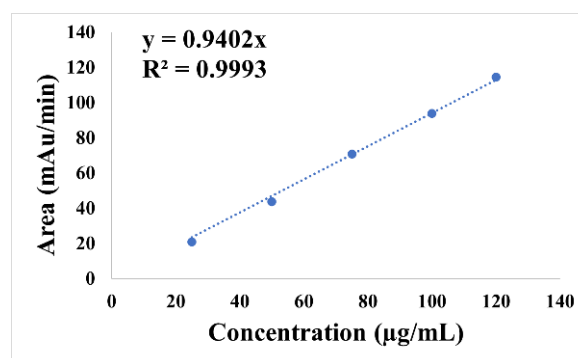

(d)

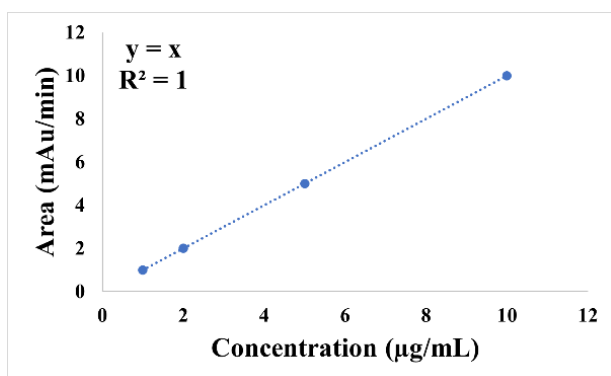

(e)

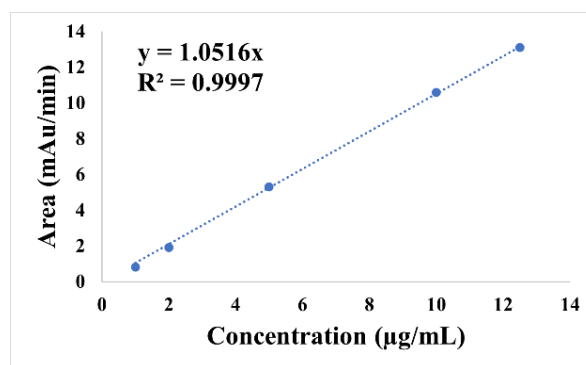

(f)

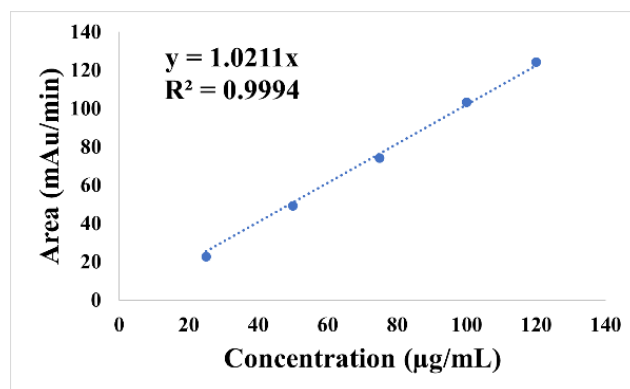

(g)

Figure S12. Calibration curves obtained as linear regressions for (a) Aniline ( $\text{PhNH}_2$ ) concentration in the range (1–12.5)  $\mu\text{g/mL}$ , (b) Aniline ( $\text{PhNH}_2$ ) concentration in the range (25–120)  $\mu\text{g/mL}$ , (c) Nitrobenzene (NB) concentration in the range (1–12.5)  $\mu\text{g/mL}$ , (d) Nitrobenzene (NB) concentration in the range (25–120)  $\mu\text{g/mL}$ , (e) Nitrobenzene (NOB) concentration in the range (1–10)  $\mu\text{g/mL}$ , (f) Phenylhydroxylamine ( $\text{PhNHOH}$ ) concentration in the range (1–12.5)  $\mu\text{g/mL}$ , (g) Phenylhydroxylamine ( $\text{PhNHOH}$ ) concentration in the range (25–120)  $\mu\text{g/mL}$ .

\* The calibration curves in figure S12 describe the suitable concentration ranges for calculating the yields obtained in the reduction experiments.

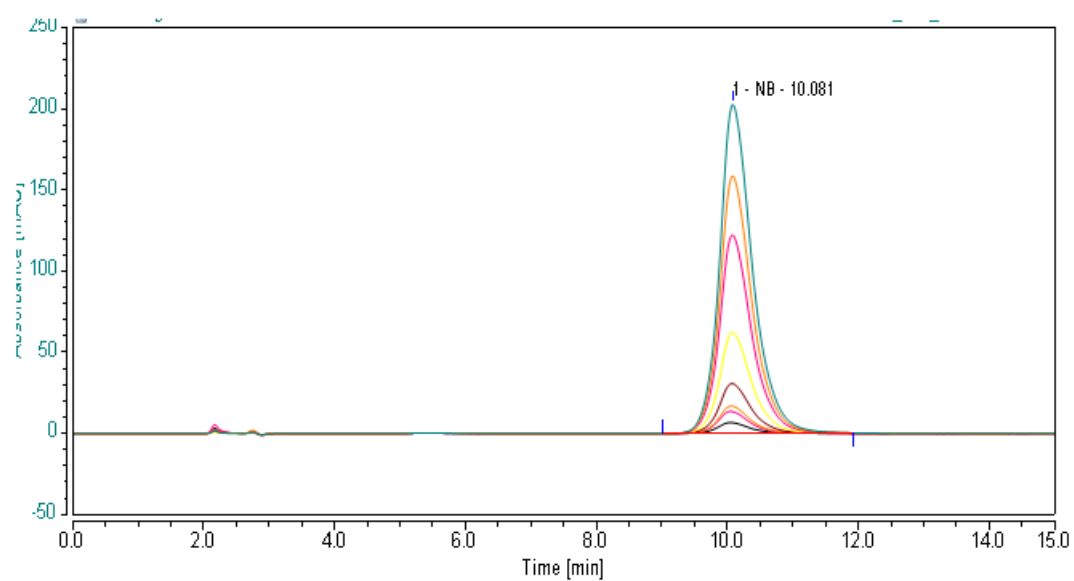

(a)

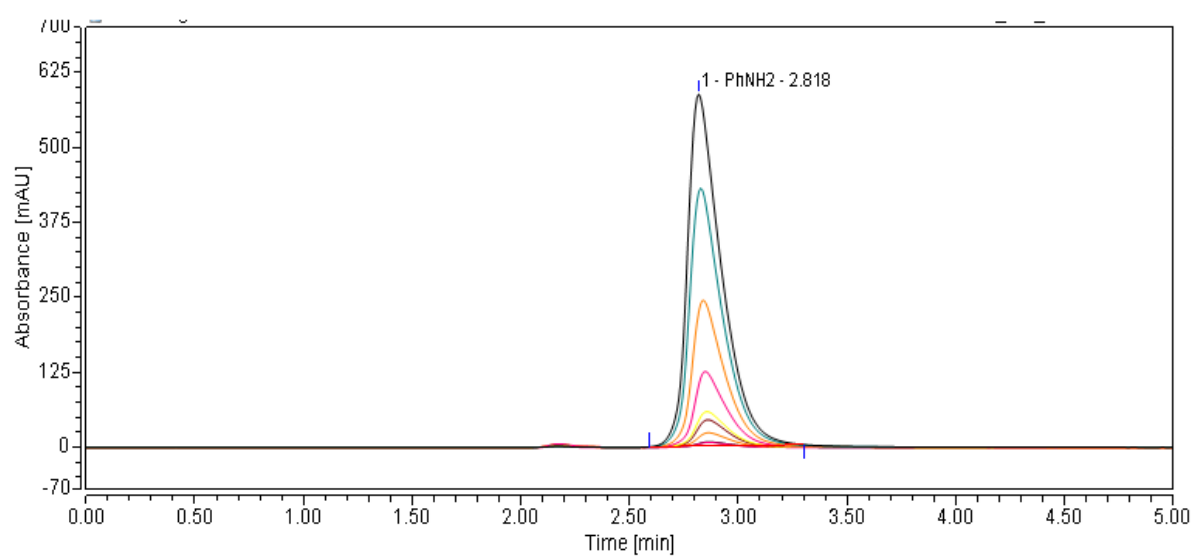

(b)

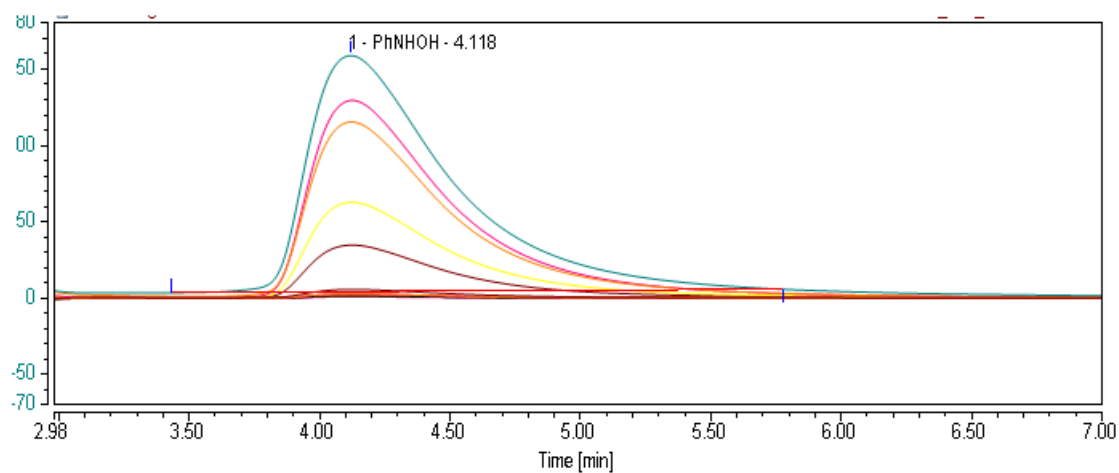

(c)

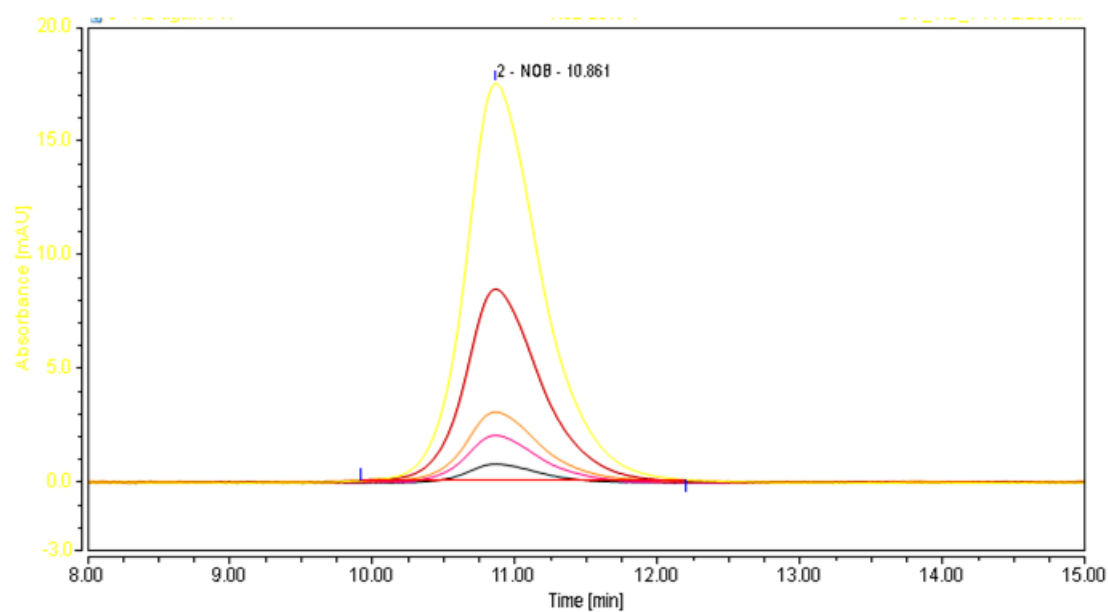

(d)

Figure S13: Typical chromatograms demonstrating specific elution times; (a) NB retention time (8.9-11.0) min., (b)  $\text{PhNH}_2$  retention time (2.5-3.2) min., (c) PhNHOH retention time (3.7-4.7) min., (d) NOB retention time (9.9-12.0) minutes.

Figure S13 demonstrates typical retention times of standards solutions in the concentration range of the standard curves presented in Fig. S12.
